# Supplementary material for: Viral MicroRNAs Encoded by Nucleocapsid Gene of SARS-CoV-2 Are Detected during Infection, and Targeting Metabolic Pathways in Host Cells
Source: MDPI journal article supplement (doi:10.3390/cells10071762), 2021-07-12
Supplement: s1 [file s1]

## *Supplementary Material*

**Table S1: List of primer sequences used for RT-qPCR**

| Gene          | NCBI Ref Seq ID | Primer Sequences (5' -> 3') |                          | Primer size (bp <sup>1</sup> ) | Primer location | Product size (bp) |
|---------------|-----------------|-----------------------------|--------------------------|--------------------------------|-----------------|-------------------|
| <i>ACO1</i>   | NM_001278352.2  | FP <sup>2</sup>             | AGAAGGGCAGACAGTTTACA     | 20                             | 587 - 606       | 123               |
|               |                 | RP <sup>3</sup>             | TGAGCCAGGGGAATAATC       | 19                             | 709 - 691       |                   |
| <i>BCAS1</i>  | NM_003657.4     | FP                          | TGCACAAGGAAGCAAAGTGC     | 20                             | 20 - 39         | 137               |
|               |                 | RP                          | AGCCCCTGTGGGAGTATCTT     | 20                             | 156 - 137       |                   |
| <i>BCAT1</i>  | NM_001178094.2  | FP                          | GCAAGATGGGAGGGAATTACG    | 21                             | 916 - 936       | 178               |
|               |                 | RP                          | GGAGGAGTTGCCAGTTCTTC     | 20                             | 1093 - 1074     |                   |
| <i>BNIP3L</i> | NM_001330491.2  | FP                          | TGGCTTTGGGGCTAGGCAT      | 19                             | 601 - 619       | 118               |
|               |                 | RP                          | GACAATACACCACTTCACAGG    | 21                             | 718 - 698       |                   |
| <i>CLDN10</i> | NM_182848.4     | FP                          | CAACAAAACACCCAGATACA     | 20                             | 631 - 650       | 167               |
|               |                 | RP                          | ATAACAAACTCAAGAGGCAG     | 20                             | 797 - 778       |                   |
| <i>DMBX1</i>  | NM_001387775.1  | FP                          | CGCCTGGCTGACATCATCTT     | 20                             | 199 - 218       | 129               |
|               |                 | RP                          | TGGGTAGTGAGTCTTCTGGA     | 20                             | 327 - 308       |                   |
| <i>MME</i>    | NM_007287.4     | FP                          | GCAACAGAAAAGTGGGAGCAAAA  | 23                             | 650 - 672       | 166               |
|               |                 | RP                          | CAAGTCGAGGTTGGTCAATATGAA | 24                             | 815 - 792       |                   |
| <i>MMP11</i>  | NM_005940.5     | FP                          | GATCGACTTCGCCAGGTAAT     | 20                             | 490 - 509       | 102               |
|               |                 | RP                          | TCCCCTTCTCGGTGAGTCTT     | 20                             | 591 - 572       |                   |
| <i>ROS1</i>   | NM_001378902.1  | FP                          | CCTACCAACTGCTCCCTTTG     | 20                             | 613 - 632       | 154               |
|               |                 | RP                          | CGGTCTGGACACAGTCTTAG     | 20                             | 766 - 747       |                   |
| <i>SNCA</i>   | NM_001375287.1  | FP                          | GTGGCAACAGTGGCTGAGAA     | 20                             | 667 - 686       | 184               |
|               |                 | RP                          | GAATTCCTTCCTGTGGGGCT     | 20                             | 850 - 831       |                   |
| <i>TFRC</i>   | NM_001313965.2  | FP                          | TCATTCTTTGGACATGCTCATCTG | 24                             | 755 - 778       | 174               |
|               |                 | RP                          | ACAGTCTCCTTCCATATTCCCAA  | 23                             | 928 - 906       |                   |

<sup>1</sup>Base pair; <sup>2</sup>Forward primer; <sup>3</sup>Reverse primer

**Table S2: List of antibodies, and dilutions used in this study**

| <b>Antibody</b>                                                         | <b>Dilutions<br/>for WB<sup>1</sup></b> | <b>Company</b>            | <b>Catalogue<br/>Number</b> |
|-------------------------------------------------------------------------|-----------------------------------------|---------------------------|-----------------------------|
| <b>NLRP3<sup>2</sup> (D2P5E), Rabbit mAb<sup>3</sup></b>                | 1:1000                                  | Cell Signaling Technology | 13158S                      |
| <b>IL-1<math>\beta</math><sup>4</sup> (D3U3E), Rabbit mAb</b>           | 1:1000                                  | Cell Signaling Technology | 12703                       |
| <b><math>\beta</math>-actin (C4), Mouse monoclonal IgG1<sup>5</sup></b> | 1:1000                                  | Santa Cruz Biotechnology  | SC47778                     |
| <b>Goat anti-rabbit IgG, HRP<sup>6</sup>-linked Ab</b>                  | 1:2000                                  | Cell Signaling Technology | 7074S                       |
| <b>Horse anti-mouse IgG, HRP-linked Ab</b>                              | 1:2000                                  | Cell Signaling Technology | 7076S                       |

<sup>1</sup>Western blotting; <sup>2</sup>Nucleotide oligomerization domain-like receptors family pyrin domain containing 3; <sup>3</sup>Monoclonal antibody; <sup>4</sup>Interleukin 1 beta; <sup>5</sup>Immunoglobulin G1; <sup>6</sup>Horse radish peroxidase

**Table S3: List of top 10 v-miRNAs encoded by SARS-CoV-2 from Calu-3 and Vero E6 cells**

| V-miRNA <sup>1</sup>          | Genome position | Size (bp <sup>2</sup> ) | Sequence 5'→3'          | Coding gene | Mean Number of reads (%) |
|-------------------------------|-----------------|-------------------------|-------------------------|-------------|--------------------------|
| <b>95<sup>3</sup>_Calu-3</b>  |                 |                         |                         |             |                          |
| v-miRNA-5'UTR-44              | 44-63           | 20                      | CGATCTCTTGTAGATCTGTT    | 5'UTR       | 2.42                     |
| v-miRNA-ORF1-2836             | 2836-2857       | 22                      | CTCTGCCTATACAGTTGAACTC  | ORF1ab      | 2.64                     |
| v-miRNA-ORF1-13613            | 13613-13631     | 19                      | AAAAGGACGAAGATGACAA     | ORF1ab      | 1.52                     |
| v-miRNA-S-22423               | 22423-22443     | 21                      | TGCTGTAGACTGTGCACTTGA   | S           | 1.39                     |
| v-miRNA-M-26823               | 26823-26843     | 21                      | AGACTGTTTGC GCGTACGCGT  | M           | 1.56                     |
| v-miRNA-ORF7-27409            | 27409-27428     | 20                      | TTCTTGGCACTGATAACACT    | ORF7a       | 2.14                     |
| v-miRNA-N-28612               | 28612-28631     | 20                      | AGGAACTGGGCCAGAAGCTG    | N           | 1.49                     |
| v-miRNA-N-29094               | 29094-29112     | 19                      | TCGGCAGACGTGGTCCAGA     | N           | 3.80                     |
| v-miRNA-N-29443               | 29443-29463     | 21                      | AAGTGTGACTCTTCTCCTGC    | N           | 1.37                     |
| v-miRNA-ORF10-29597           | 29597-29616     | 20                      | TATAGTCTACTCTTGTGCAG    | ORF10       | 1.84                     |
| <b>405<sup>4</sup>_Calu-3</b> |                 |                         |                         |             |                          |
| v-miRNA-5'UTR-44              | 44-63           | 20                      | CGATCTCTTGTAGATCTGTT    | 5'UTR       | 2.57                     |
| v-miRNA-ORF1-4581             | 4581-4599       | 19                      | ACGATCTAAATGAAACTCT     | ORF1ab      | 1.36                     |
| v-miRNA-ORF1-7458             | 7458-7479       | 22                      | TGCATGTTGTAGACGGTTGTAA  | ORF1ab      | 1.01                     |
| v-miRNA-S-22423               | 22423-22443     | 21                      | TGCTGTAGACTGTGCACTTGA   | S           | 3.25                     |
| v-miRNA-M-26823               | 26823-26843     | 21                      | AGACTGTTTGC GCGTACGCGT  | M           | 2.36                     |
| v-miRNA-ORF7-27409            | 27409-27428     | 20                      | TTCTTGGCACTGATAACACT    | ORF7a       | 1.50                     |
| v-miRNA-N-28612               | 28612-28631     | 20                      | AGGAACTGGGCCAGAAGCTG    | N           | 3.14                     |
| v-miRNA-N-29094               | 29094-29112     | 19                      | TCGGCAGACGTGGTCCAGA     | N           | 8.01                     |
| v-miRNA-N-29443               | 29443-29463     | 21                      | AAGTGTGACTCTTCTCCTGC    | N           | 1.82                     |
| v-miRNA-ORF10-29597           | 29597-29616     | 20                      | TATAGTCTACTCTTGTGCAG    | ORF10       | 1.96                     |
| <b>95_Vero E6</b>             |                 |                         |                         |             |                          |
| v-miRNA-ORF1-3109             | 3109-3127       | 19                      | GTATGGTACTGAAGATGAT     | ORF1ab      | 1.34                     |
| v-miRNA-ORF1-3237             | 3237-3255       | 19                      | AAGACGGCAGTGAGGACAA     | ORF1ab      | 0.91                     |
| v-miRNA-ORF1-7459             | 7459-7479       | 21                      | GCAATGTTGTAGACGGTTGTAA  | ORF1ab      | 1.07                     |
| v-miRNA-S-22423               | 22423-22443     | 21                      | TGCTGTAGACTGTGCACTTGA   | S           | 2.34                     |
| v-miRNA-M-26823               | 26823-26843     | 21                      | AGACTGTTTGC GCGTACGCGT  | M           | 1.50                     |
| v-miRNA-M-26990               | 26990-27011     | 22                      | AGGACGCTGTGACATCAAGGAC  | M           | 1.17                     |
| v-miRNA-N-28386               | 28386-28405     | 20                      | AACAACGTCGGCCCCAAGGT    | N           | 1.07                     |
| v-miRNA-N-28612               | 28612-28631     | 20                      | AGGAACTGGGCCAGAAGCTG    | N           | 0.74                     |
| v-miRNA-N-29094               | 29094-29112     | 16                      | TCGGCAGACGTGGTCCAGA     | N           | 1.48                     |
| v-miRNA-ORF10-29597           | 29597-29616     | 20                      | TATAGTCTACTCTTGTGCAG    | ORF10       | 1.15                     |
| <b>405_Vero E6</b>            |                 |                         |                         |             |                          |
| v-miRNA-ORF1-3109             | 3109-3127       | 19                      | GTATGGTACTGAAGATGAT     | ORF1ab      | 1.65                     |
| v-miRNA-ORF1-3237             | 3237-3255       | 19                      | AAGACGGCAGTGAGGACAA     | ORF1ab      | 1.74                     |
| v-miRNA-ORF1-7459             | 7459-7479       | 21                      | GCAATGTTGTAGACGGTTGTAA  | ORF1ab      | 1.37                     |
| v-miRNA-S-22423               | 22423-22443     | 21                      | TGCTGTAGACTGTGCACTTGA   | S           | 13.5                     |
| v-miRNA-ORF3-25528            | 25528-25547     | 20                      | CTTATTGTTGGCGTTGCACT    | ORF3a       | 1.60                     |
| v-miRNA-M-26820               | 26820-26841     | 22                      | TTCAGACTGTTTGC GCGTACGC | M           | 2.74                     |
| v-miRNA-M-26990               | 26990-27011     | 22                      | AGGACGCTGTGACATCAAGGAC  | M           | 2.55                     |
| v-miRNA-N-28612               | 28612-28631     | 20                      | AGGAACTGGGCCAGAAGCTG    | N           | 0.34                     |
| v-miRNA-N-29136               | 29136-29156     | 21                      | ACCAGGAATAATCAGACAAG    | N           | 1.03                     |
| v-miRNA-3'UTR-29688           | 29688-29708     | 21                      | GTGTGTAACATTAGGGAGGAC   | 3'UTR       | 2.16                     |

<sup>1</sup>Viral microRNA; <sup>2</sup>Base pair; <sup>3</sup>SARS-CoV-2, clone Hong Kong-95; <sup>4</sup>SARS-CoV-2, clone Hong Kong-405

**Table S4: List of differentially expressed metabolic genes and their respective log<sub>2</sub> fold changes**

| Target gene   | Log <sub>2</sub> FC <sup>1</sup> | P value               | Key functions in the metabolic pathways                                                                                    |
|---------------|----------------------------------|-----------------------|----------------------------------------------------------------------------------------------------------------------------|
| <i>ACO1</i>   | -1.6                             | 3.93E <sup>-20</sup>  | Involved in TCA cycle and interacts with mRNA to control the levels of iron inside cells, and carbon metabolism            |
| <i>BCAS1</i>  | -2                               | 2.47E <sup>-3</sup>   | Plays a role in myelinating oligodendrocytes related to multiple sclerosis lesions                                         |
| <i>BCAT1</i>  | -1.9                             | 8.94E <sup>-9</sup>   | Controls metabolic reprogramming, and promotes cell proliferation through amino acid catabolism                            |
| <i>BNIP3L</i> | -1.4                             | 5.05E <sup>-21</sup>  | Apoptosis modulation; signaling and gene expression                                                                        |
| <i>CLDN10</i> | -1.3                             | 2.87E <sup>-7</sup>   | Regulates blood-brain barrier, and immune cell transmigration                                                              |
| <i>DMBX1</i>  | -2.3                             | 4.33E <sup>-5</sup>   | Plays a role in brain and sensory organ development, and in normal regulation of energy homeostasis and behavior           |
| <i>KIF12</i>  | -1.2                             | 1.44E <sup>-6</sup>   | Antioxidant activity; intracellular transport; cell division                                                               |
| <i>MME</i>    | -1.5                             | 1.56E <sup>-7</sup>   | A neutral endopeptidase that cleaves and inactivates peptides, including hormones                                          |
| <i>MMP11</i>  | -2.4                             | 2.14E <sup>-19</sup>  | Plays a role in controlling energy metabolism; extracellular matrix (ECM) remodeling/degradations; metabolic reprogramming |
| <i>PBX1</i>   | -1.2                             | 3.43E <sup>-3</sup>   | Promotes cell proliferation and plays oncogenic activity; regulate osteogenesis; enhances cellular metabolism              |
| <i>ROS1</i>   | -2.2                             | 6.38E <sup>-5</sup>   | Involved in cell differentiation and has oncogenic role                                                                    |
| <i>SNCA</i>   | -2.8                             | 8.04E <sup>-15</sup>  | Enhances glucose uptake and utilization; integrate presynaptic signaling, and membrane trafficking                         |
| <i>SYT12</i>  | -1.3                             | 2.57E <sup>-3</sup>   | Mediate calcium-dependent regulation of membrane trafficking in synaptic transmission                                      |
| <i>TFRC</i>   | -1.1                             | 1.22E <sup>-151</sup> | Required for erythropoiesis and neurologic development; iron transport                                                     |
| <i>UPK1B</i>  | -1.2                             | 2.52E <sup>-16</sup>  | Mediate signal transduction events that play a role in the regulation of cell development, activation, growth and motility |

<sup>1</sup>Log<sub>2</sub> Fold Change

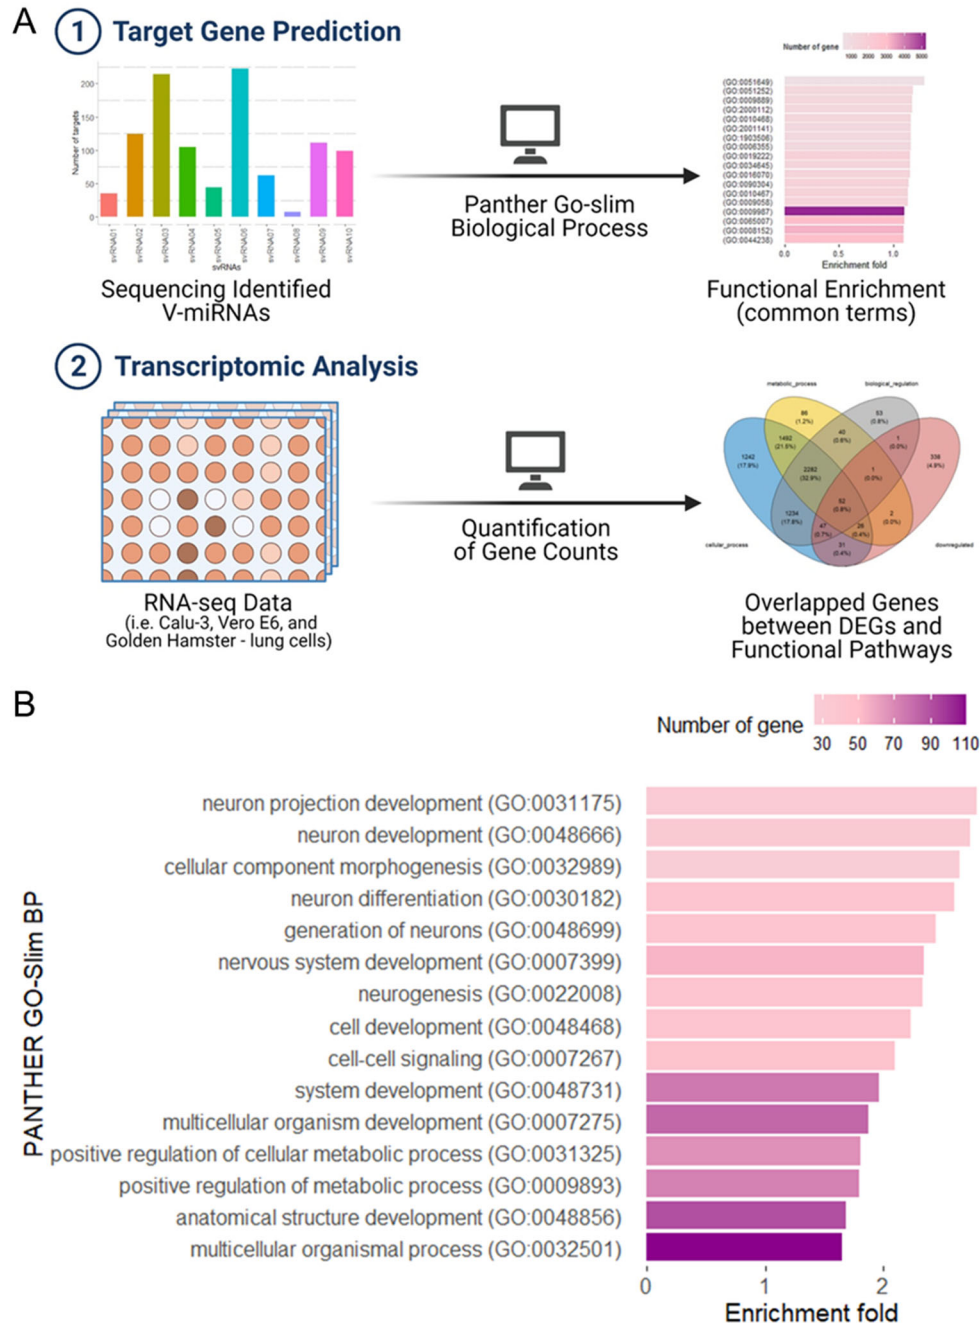

**Figure S1.** SARS-CoV-2-encoded v-miRNAs target host genes that are involved in metabolic pathways. **(A)** GO analysis indicates the main enrichment terms targeted by SARS-CoV-2-encoded v-miRNAs. (1) Shows the target gene prediction and selected common terms; (2) Shows transcriptomic analysis, and genes overlapping between DEGs and functional pathways. **(B)** Enriched common GO pathways for v-miRNA potential targets predicted by using the overlap of miRDB and Diana. The most significant 15 GO terms are selected for the presentation. The color represents the number of predicted genes in each GO term.
